# Supplementary material for: Prospective Feasibility Study of A Mindfulness-Based Program for Breast Cancer Patients in the Southeastern US
Source: Research Square preprint supplement (doi:10.21203/rs.3.rs-138508/v1), 2021-01-28
Supplement: Supplementary file 1 [file 1a98f9b821ee54f26681417d.xlsx]

## Sheet: FFMQ
Variable: Mindfulness
Patient ID	Visit	FFM1_1	FFM2_1	FFM3_1	FFM4_1	FFM5_1	FFM6_1	FFM7_1	FFM8_1	FFM9_1	FFM10_1	FFM11_1	FFM12_1	FFM13_1	FFM14_1	FFM15_1	FFM16_1	FFM17_1	FFM18_1	FFM19_1	FFM20_1	FFM21_1	FFM22_1	FFM23_1	FFM24_1	FFM25_1	FFM26_1	FFM27_1	FFM28_1	FFM29_1	FFM30_1	FFM31_1	FFM32_1	FFM33_1	FFM34_1	FFM35_1	FFM36_1	FFM37_1	FFM38_1	FFM39_1
101_1	1	1	3	5	2	4	2	3	4	3	4	4	2	4	4	3	2	4	4	2	4	3	2	4	2	4	4	3	3	2	4	4	3	2	4	4	3	3	4	4
101_2	2	3	3	2	4	4	4	2	2	4	2	4	5	5	3	4	4	3	3	4	4	4	3	2	4	3	5	4	3	4	3	5	2	4	3	1	3	2	3	2
101_3	3	3	3	3	3	3	5	3	2	3	3	5	3	2	4	5	3	4	3	4	5	4	2	3	4	4	5	5	3	4	3	5	3	3	3	4	5	3	3	3
102_1	1	5	3	5	2	5	5	3	5	2	5	5	3	5	5	5	3	5	5	3	5	2	3	2	3	5	5	3	3	2	5	5	3	3	2	5	5	3	3	5
102_2	2	3	2	3	4	5	3	2	3	2	5	3	4	4	5	3	5	5	4	5	5	2	3	4	4	5	5	1	4	2	5	5	3	3	4	5	4	3	3	5
102_3	3	4	3	4	3	4	4	3	4	3	5	3	3	4	5	4	4	5	4	4	5	3	4	4	4	5	5	2	3	3	4	5	4	2	4	5	3	3	3	5
104_1	1	4	3	3	2	5	2	2	4	1	4	1	4	5	4	4	4	1	5	2	5	2	2	4	2	4	5	4	4	1	3	5	5	1	4	4	4	4	5	2
104_2	2	4	4	3	2	4	4	3	3	2	2	3	3	4	2	4	3	1	3	3	5	3	2	4	2	2	5	3	2	3	2	5	4	3	3	1	4	3	4	1
104_3	3	4	5	1	4	3	5	5	2	4	1	5	2	3	1	5	1	1	2	4	5	4	1	3	4	1	5	5	2	5	1	5	5	4	2	1	5	5	2	1
105_1	1	4	5	3	3	2	4	5	2	3	3	4	2	2	1	4	1	2	2	3	4	4	3	3	4	1	4	5	3	3	1	4	5	3	3	2	3	4	3	1
105_2	2	3	4	2	4	3	4	5	2	3	1	3	1	2	2	5	1	2	2	4	5	4	2	2	4	1	5	4	2	4	1	5	5	4	2	1	4	4	2	1
105_3	3	3	4	2	3	2	5	4	2	3	2	4	2	2	2	5	2	2	2	4	5	4	2	2	4	2	5	4	3	2	1	5	4	4	2	1	4	4	2	1
106_1	1	5	4	5	4	5	3	4	5	3	4	3	2	5	4	4	3	4	4	3	3	4	3	3	3	4	5	3	3	4	4	5	4	3	3	4	4	4	3	5
106_2	2	5	4	3	5	3	5	5	2	4	3	4	2	3	2	5	2	3	2	4	5	4	2	2	4	3	5	5	2	4	2	5	4	4	3	3	4	5	3	1
106_3	3	5	4	2	4	2	5	5	2	4	3	4	2	3	2	5	3	3	2	4	4	4	2	2	4	3	5	4	2	4	2	5	4	4	2	2	4	4	3	2
108_1	1	4	2	4	2	3	1	3	3	3	3	3	3	2	3	4	3	3	3	2	3	2	4	3	2	3	5	3	2	2	3	2	4	2	3	4	3	2	3	4
108_2	2	3	1	1	1	3	4	3	3	1	3	3	3	3	4	3	4	3	3	1	3	2	3	4	2	3	4	2	3	1	4	2	2	2	3	3	3	2	3	3
108_3	3	3	3	3	3	2	3	4	2	2	3	3	3	2	2	4	3	3	2	3	3	4	3	2	3	3	4	3	2	3	3	4	2	3	2	3	3	2	2	3
111_1	1	5	5	3	4	2	5	5	3	3	2	5	1	3	3	5	1	4	3	3	4	4	1	4	3	2	5	5	3	3	3	4	5	2	3	1	3	4	3	2
111_2	2	5	5	3	4	3	4	5	3	4	2	5	1	3	2	5	1	2	3	4	4	4	1	2	3	2	5	5	3	3	2	5	5	4	2	1	4	3	1	1
111_3	3	3	5	2	5	4	4	5	3	4	2	3	2	3	2	4	2	2	3	4	4	5	0	3	3	1	4	4	3	5	1	5	5	3	3	1	3	5	2	1
112_1	1	4	3	3	3	4	2	2	2	4	2	3	3	3	2	2	3	2	3	1	2	3	3	3	4	1	4	3	2	3	1	3	2	4	3	3	3	4	3	3
112_2	2	4	3	3	3	3	4	3	2	3	4	4	3	3	2	3	3	4	4	3	3	3	3	2	4	3	4	3	3	3	3	4	3	3	3	3	4	4	3	3
112_3	3	4	2	3	3	4	3	3	3	4	2	2	3	3	2	3	3	3	3	3	3	3	3	3	3	3	3	3	3	3	2	3	2	3	3	3	3	3	3	2
113_1	1	5	3	1	3	4	5	3	3	3	1	4	4	3	1	4	5	3	4	3	5	3	3	2	3	1	5	2	2	2	1	4	3	2	2	2	3	2	2	1
113_2	2	4	3	1	3	5	5	3	3	1	2	2	3	3	1	4	4	2	4	4	4	4	3	4	3	1	3	4	2	3	1	5	3	2	1	1	3	3	2	1
113_3	3	3	4	1	3	3	4	3	1	2	1	3	3	2	1	4	3	1	2	3	4	4	3	2	4	1	5	3	1	4	1	5	3	2	1	1	4	3	1	1
