# Supplementary material for: Prospective Feasibility Study of A Mindfulness-Based Program for Breast Cancer Patients in the Southeastern US
Source: Research Square preprint supplement (doi:10.21203/rs.3.rs-138508/v1), 2021-01-28
Supplement: Supplementary file 2 [file c4c617d04840014778f94b90.xlsx]

## Sheet: Self_Compassion_Scale
Variable: Self-Compassion
Patient ID	Visit	SCS1_1	SCS2_1	SCS3_1	SCS4_1	SCS5_1	SCS6_1	SCS7_1	SCS8_1	SCS9_1	SCS10_1	SCS11_1	SCS12_1	SCS13_1	SCS14_1	SCS15_1	SCS16_1	SCS17_1	SCS18_1	SCS19_1	SCS20_1	SCS21_1	SCS22_1	SCS23_1	SCS24_1	SCS25_1	SCS26_1
101_1	1	5	4	4	4	3	3	4	3	3	3	4	2	3	3	2	3	3	3	2	4	3	3	3	4	4	3
101_2	2	2	2	3	4	3	4	4	3	3	3	3	3	2	3	2	4	2	2	3	3	3	4	3	2	4	3
101_3	3	3	2	4	3	4	3	4	3	4	3	2	3	1	4	3	2	4	2	3	3	2	4	4	2	2	4
102_1	1	5	5	4	4	3	3	5	4	1	4	4	3	3	3	4	4	4	3	2	5	5	3	3	5	5	4
102_2	2	5	5	4	5	4	5	4	4	4	4	4	4	3	4	4	4	4	4	3	5	5	3	3	5	5	4
102_3	3	3	4	3	4	2	2	3	4	4	3	4	2	3	3	3	4	3	3	2	4	4	2	3	4	4	4
104_1	1	5	5	3	4	1	4	2	4	4	2	4	1	3	4	3	4	2	4	2	3	4	1	2	2	5	2
104_2	2	1	3	4	4	3	3	1	4	4	4	1	2	3	3	3	2	4	2	4	3	2	3	2	1	2	4
104_3	3	2	2	5	3	3	3	5	4	5	5	2	2	2	4	3	1	4	2	2	1	2	4	3	1	4	2
105_1	1	2	3	5	1	4	2	5	2	4	5	3	4	1	5	5	2	4	1	5	4	1	3	4	3	2	4
105_2	2	1	2	5	1	5	2	5	1	4	5	2	5	1	5	5	2	5	1	5	3	1	4	4	3	1	4
105_3	3	2	2	4	1	4	1	5	2	4	4	2	5	1	4	4	1	4	2	5	3	1	4	4	2	2	4
106_1	1	4	3	4	4	2	2	4	5	5	4	5	3	3	4	4	4	3	3	3	2	4	3	4	3	4	2
106_2	2	2	2	5	3	4	2	5	3	4	3	3	4	1	5	5	2	4	1	4	2	2	4	3	1	1	3
106_3	3	3	1	4	3	4	1	4	3	5	5	3	3	1	5	5	2	4	2	4	2	4	4	3	2	3	2
108_1	1	4	4	3	4	2	4	3	4	2	2	3	1	1	2	2	4	3	4	2	3	4	2	2	3	3	2
108_2	2	5	4	3	4	2	3	1	4	3	3	4	1	4	2	2	3	2	4	3	3	4	2	2	3	4	2
108_3	3	3	3	3	2	3	3	3	3	3	3	3	2	3	3	3	3	2	3	3	3	4	3	2	4	3	3
111_1	1	3	4	4	4	4	4	4	3	4	4	3	4	3	4	4	3	4	3	4	3	2	3	3	2	4	3
111_2	2	1	2	5	4	5	4	5	3	4	5	1	4	1	4	4	2	3	3	4	2	1	3	3	1	4	4
111_3	3	1	2	5	3	5	4	5	1	4	5	1	5	3	5	4	2	5	3	5	2	1	3	3	1	2	3
112_1	1	3	3	4	3	3	2	4	4	4	4	2	3	2	4	4	2	4	3	4	4	2	4	4	2	2	4
112_2	2	4	4	4	3	3	3	4	4	4	4	3	3	3	4	4	2	4	2	3	3	3	4	4	2	3	4
112_3	3	3	2	3	3	3	3	3	3	4	3	3	3	3	3	3	3	3	2	3	3	3	3	3	3	3	3
113_1	1	1	2	3	1	5	1	5	2	3	4	2	5	3	4	4	2	4	2	5	3	1	5	5	2	3	4
113_2	2	1	1	3	1	5	1	4	1	4	5	1	5	1	5	4	1	5	2	5	2	1	4	4	2	1	4
113_3	3	1	1	3	1	5	1	5	1	3	1	1	5	1	3	3	1	4	1	5	3	1	4	4	1	1	4
